# Supplementary material
Source: PubMed Central journal article supplement (PMC2585980)

## Supporting Information

### Scope and Mechanistic Study of the Ruthenium-Catalyzed *Ortho*-C-H Bond Activation and Cyclization Reactions of Arylamines with Terminal Alkynes

Chae S. Yi\* and Sang Young Yun

*Department of Chemistry, Marquette University, Milwaukee, Wisconsin 53201-1881*

**Table S1.** Catalyst Activity Survey of Selected Ruthenium Complexes.<sup>a</sup>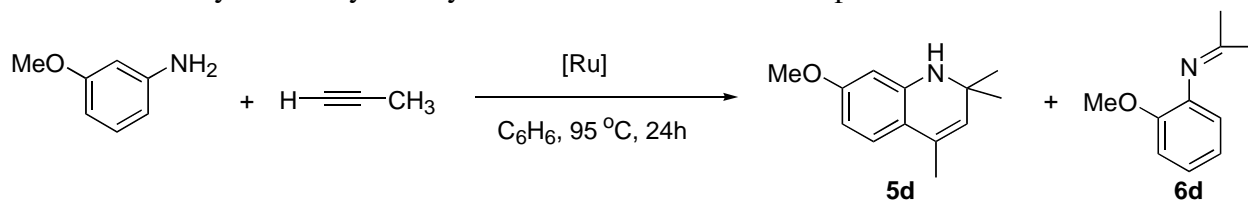

| Entry | Catalyst                                           | Additive                          | % yield (5d:6d) <sup>b</sup> |
|-------|----------------------------------------------------|-----------------------------------|------------------------------|
| 1     | (PCy <sub>3</sub> ) <sub>2</sub> (CO)RuHCl         | none                              | 0                            |
| 2     |                                                    | NH <sub>4</sub> PF <sub>6</sub>   | 35:39                        |
| 3     |                                                    | HBf <sub>4</sub> OEt <sub>2</sub> | 43:28                        |
| 4     |                                                    | AlCl <sub>3</sub>                 | 0                            |
| 5     | Ru <sub>3</sub> (CO) <sub>12</sub> ( <b>4</b> )    | none                              | 0                            |
| 6     |                                                    | NH <sub>4</sub> PF <sub>6</sub>   | 82:7                         |
| 7     |                                                    | HBf <sub>4</sub> OEt <sub>2</sub> | 92:2                         |
| 8     | (PPh <sub>3</sub> ) <sub>3</sub> RuCl <sub>2</sub> | none                              | 0                            |
| 9     |                                                    | NH <sub>4</sub> PF <sub>6</sub>   | 15:40                        |
| 10    |                                                    | HBf <sub>4</sub> OEt <sub>2</sub> | 21:38                        |

<sup>a</sup>Reaction conditions: 3-methoxyaniline (0.4 mmol), propyne (2 mmol), Ru catalyst (2 mol%), additive (6 mol%), benzene (2 mL), 95 °C, 24 h. <sup>b</sup>Determined by GC.

**Figure S1.** Pseudo first-order plots of  $-\ln([\text{aniline}]_t/[\text{aniline}]_0)$  vs time. The  $k_{\text{obs}} = 9.6 \times 10^{-2} \text{ h}^{-1}$  for  $\text{C}_6\text{H}_5\text{NH}_2$  ((●),  $R^2 = 0.99$ ) and  $k_{\text{obs}} = 3.9 \times 10^{-2} \text{ h}^{-1}$  for  $\text{C}_6\text{D}_5\text{NH}_2$  ((■),  $R^2 = 0.98$ ).

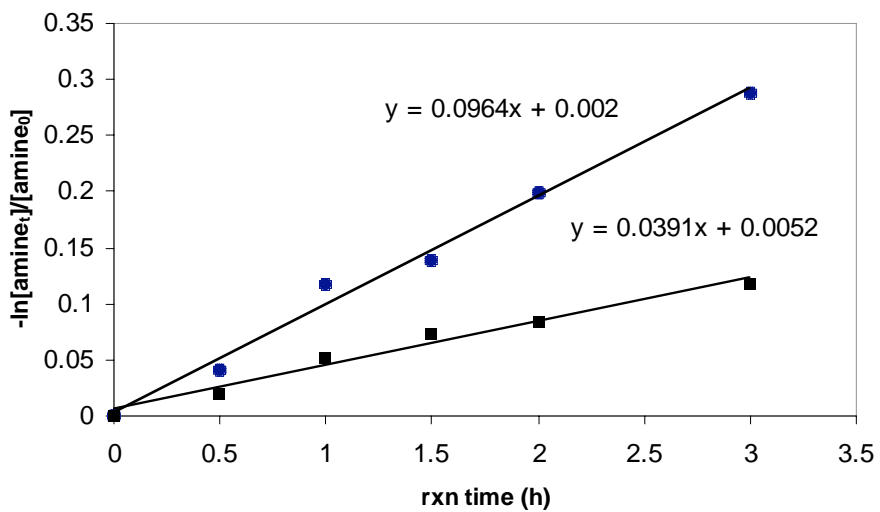

**Figure S2.** PCy<sub>3</sub> inhibition study for the coupling reaction of indoline with propyne (no PCy<sub>3</sub>

(●), 5 mol % PCy<sub>3</sub> (○)).

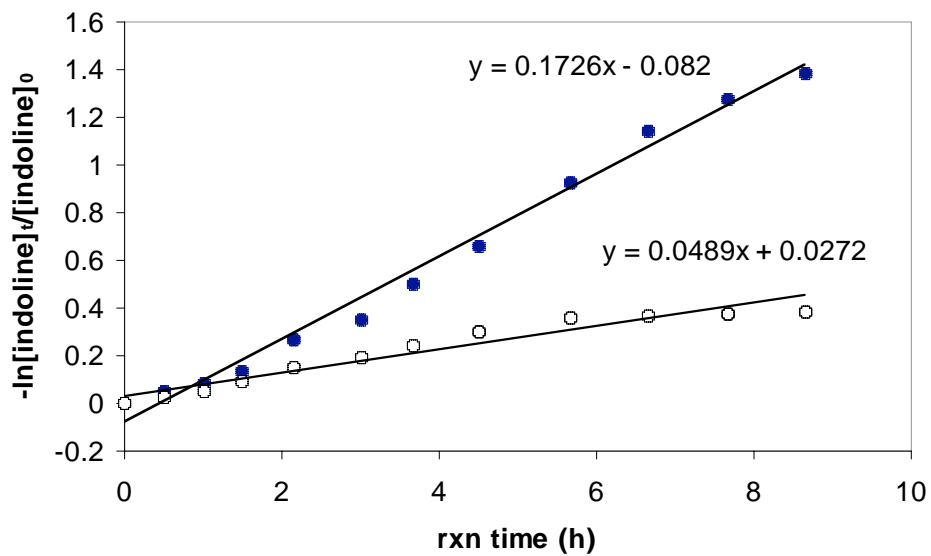

**Figure S3.** First order plots of  $-\ln([p\text{-X-C}_6\text{H}_5\text{NH}_2]_t/[p\text{-X-C}_6\text{H}_5\text{NH}_2]_0)$  vs time. X = OMe ( $k_{\text{obs}} = 8.5 \times 10^{-1} \text{ h}^{-1}$ ), Me ( $k_{\text{obs}} = 2.1 \times 10^{-1} \text{ h}^{-1}$ ), H ( $k_{\text{obs}} = 6.1 \times 10^{-2} \text{ h}^{-1}$ ), CF<sub>3</sub> ( $k_{\text{obs}} = 1.1 \times 10^{-2} \text{ h}^{-1}$ ).

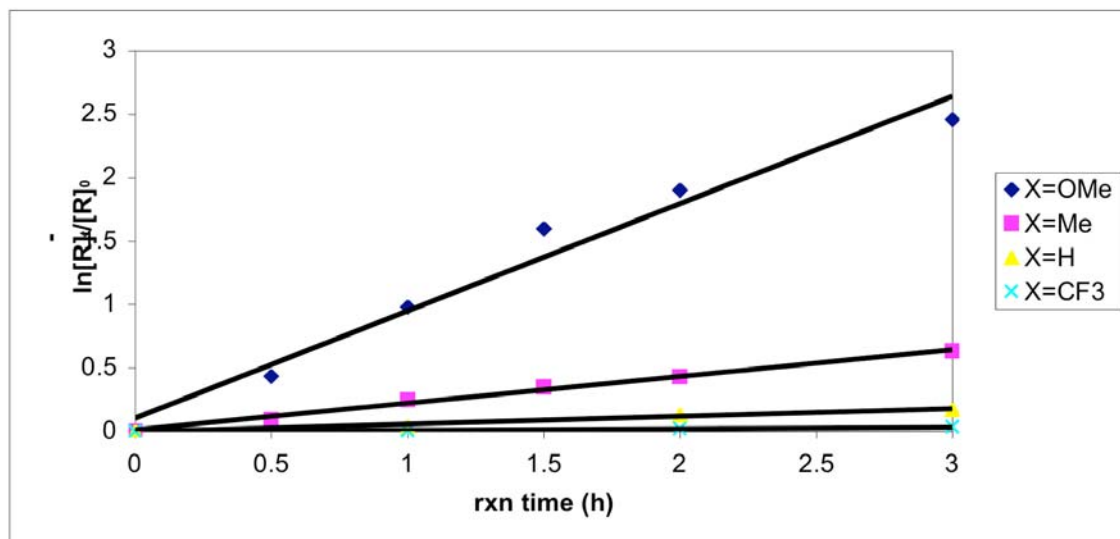

**Figure S4.** The  $^1\text{H}$  and  $^2\text{H}$  NMR Spectra of Deuterium-Labeled **5i**.

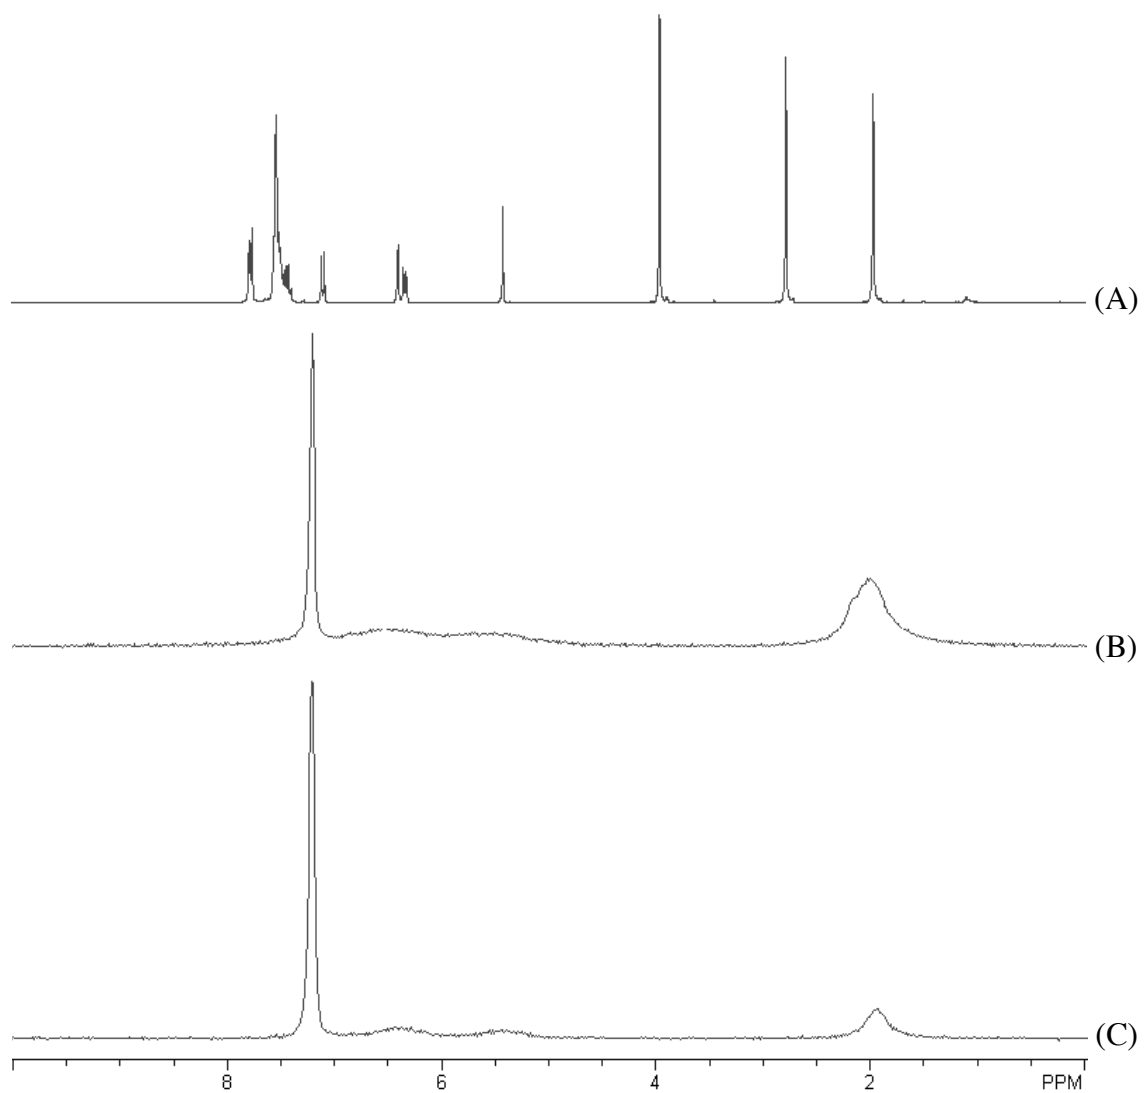

(A)  $^1\text{H}$  NMR spectrum of **5i**; (B)  $^2\text{H}$  NMR spectrum of **5i-d** obtained from the reaction of  $m\text{-OMe-C}_6\text{H}_4\text{NHCH}_3$  and  $\text{DC}\equiv\text{CPh}$ ; (C)  $^2\text{H}$  NMR spectrum of **5i-d** obtained from the reaction of  $m\text{-OMe-C}_6\text{H}_4\text{NDCH}_3$  and  $\text{HC}\equiv\text{CPh}$ .

**Scheme S1.** Deuterium incorporation analysis for the reaction of 1-(2-aminophenyl)pyrrole with  $\text{DC}\equiv\text{CPh}$  and  $\text{HC}\equiv\text{CC}_6\text{H}_4\text{-}p\text{-OMe}$ .

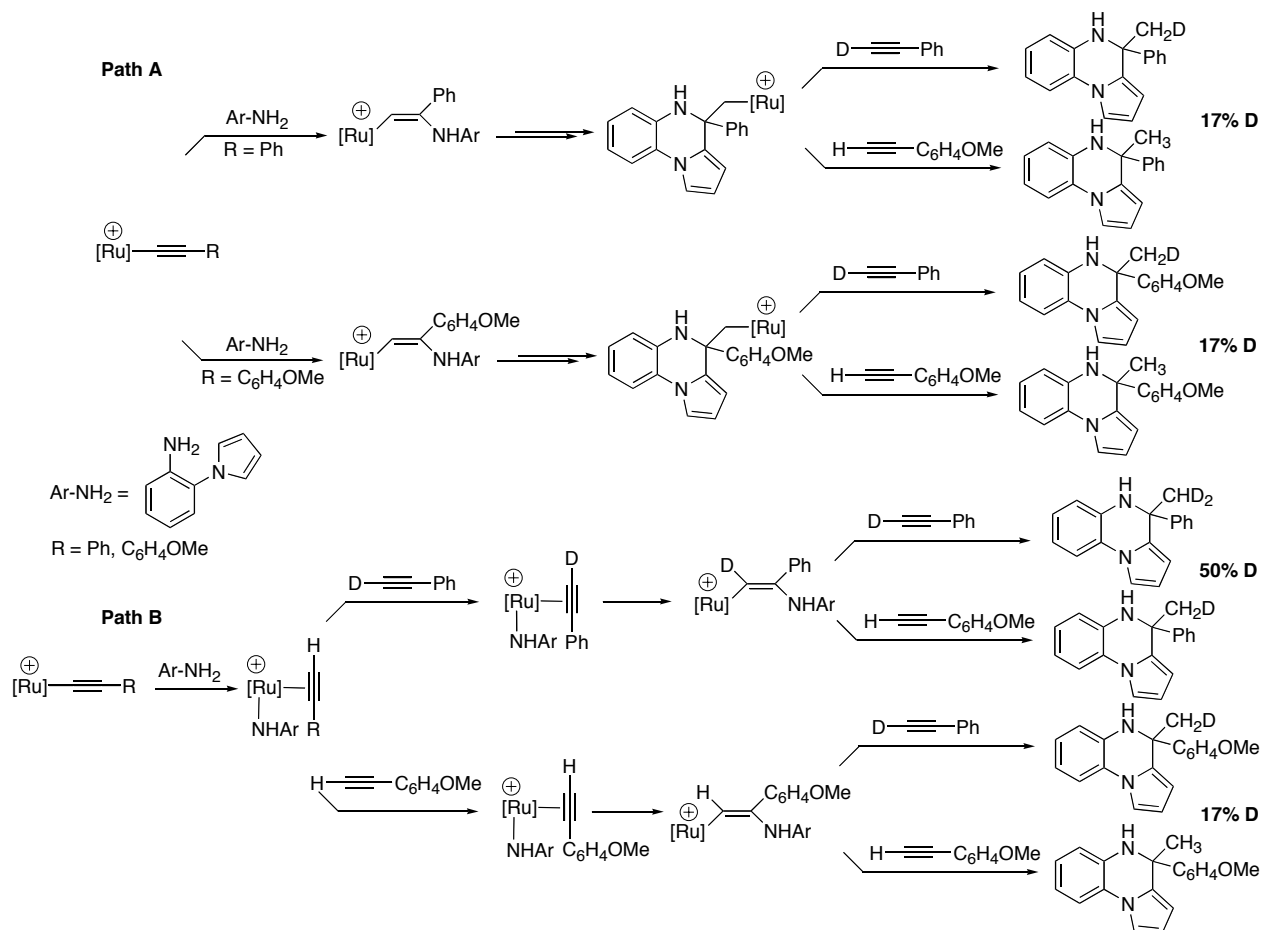

### Spectroscopic Data of Organic Products.

For **5a**:  $^1\text{H}$  NMR ( $\text{C}_6\text{D}_6$ , 300 MHz)  $\delta$  7.03 (m, 2H, Ar), 6.68 (td,  $J = 7.8, 1.2$  Hz, 1H, Ar), 6.24 (dd,  $J = 8.1, 1.2$  Hz, 1H, Ar), 5.09 (s,  $\text{CH}_3\text{C}=\text{CH}$ ), 3.16 (br s, NH), 1.83 (d,  $J = 1.2$  Hz,  $\text{CH}_3\text{C}=\text{CH}$ ), 1.04 (s,  $\text{NC}(\text{CH}_3)_2$ );  $^{13}\text{C}\{^1\text{H}\}$  NMR ( $\text{C}_6\text{D}_6$ , 75 MHz)  $\delta$  144.2, 129.2, 129.1, 128.8, 124.4, 122.0, 117.6, 113.5, 52.2 ( $\text{NC}(\text{CH}_3)_2$ ), 31.5 ( $2\text{CH}_3$ ), 19.3 ( $\text{CH}_3$ ); GC-MS ( $M^+ = 173$ ); Anal. Calcd for  $\text{C}_{12}\text{H}_{15}\text{N}$ : C, 83.24; H, 10.42. Found C, 83.31; H, 10.39.

For **5b**:  $^1\text{H}$  NMR ( $\text{CDCl}_3$ , 300 MHz)  $\delta$  7.01 (d,  $J = 7.5$  Hz, 1H, Ar), 6.51 (d,  $J = 6.3$  Hz, 1H, Ar), 6.23 (s, 1H, Ar), 5.29 (q,  $J = 1.2$  Hz,  $\text{CH}_3\text{C}=\text{CH}$ ), 3.64 (br s, NH), 2.27 (s,  $\text{ArCH}_3$ ), 2.02 (d,  $J = 1.2$  Hz,  $\text{CH}_3\text{C}=\text{CH}$ ), 1.30 (s,  $\text{NC}(\text{CH}_3)_2$ );  $^{13}\text{C}\{^1\text{H}\}$  NMR ( $\text{CDCl}_3$ , 75 MHz)  $\delta$  143.4, 138.4, 128.6, 127.5, 123.7, 119.2, 118.1, 113.7, 51.9 ( $\text{NC}(\text{CH}_3)_2$ ), 31.1 ( $\text{NC}(\text{CH}_3)_2$ ), 21.5 ( $\text{ArCH}_3$ ), 18.7 ( $\text{CH}_3$ ); HRMS ( $m/z$ ): calcd for  $\text{C}_{13}\text{H}_{17}\text{N}$  ( $M^+$ ), 187.1361; found, 187.1361.

For **5c**:  $^1\text{H}$  NMR ( $\text{CDCl}_3$ , 300 MHz)  $\delta$  6.90 (d,  $J = 8.1$  Hz, 1H, Ar), 6.36 (d,  $J = 7.8$  Hz, 1H, Ar), 6.18 (s, 1H, Ar), 5.01 (s,  $\text{CH}_3\text{CH}_2\text{C}=\text{CH}$ ), 3.43 (br s, NH), 2.62 (m,  $\text{CH}(\text{CH}_3)_2$ ), 2.24 (q,  $J = 7.5$  Hz,  $\text{CH}_2$ ), 1.38 (m,  $\text{CH}_2$ ), 1.08 (s,  $\text{CH}_3$ ), 1.07 (d,  $J = 6.6$  Hz,  $\text{CH}(\text{CH}_3)_2$ ), 1.03 (t,  $J = 7.5$  Hz,  $\text{CH}_2\text{CH}_3$ ), 0.78 (t,  $J = 7.6$  Hz,  $\text{CH}_2\text{CH}_3$ );  $^{13}\text{C}\{^1\text{H}\}$  NMR ( $\text{CDCl}_3$ , 75 MHz)  $\delta$  149.4, 144.0, 134.8, 124.3, 123.2, 118.6, 115.0, 110.9, 54.8 ( $\text{NC}(\text{CH}_3)\text{CH}_2\text{CH}_3$ ), 36.7 (CH), 36.8 ( $\text{CH}_2$ ), 34.1 ( $\text{CH}_2$ ), 24.8 ( $\text{CH}_3$ ), 24.1 ( $\text{CH}(\text{CH}_3)_2$ ), 13.1 ( $\text{CH}_3$ ), 8.8 ( $\text{CH}_3$ ); HRMS ( $m/z$ ): calcd for  $\text{C}_{19}\text{H}_{29}\text{NO}$  ( $M^+$ ), 243.1987; found, 243.1969.

For **5d**:  $^1\text{H}$  NMR ( $\text{CDCl}_3$ , 300 MHz)  $\delta$  7.01 (d,  $J = 8.4$  Hz, 1H, Ar), 6.23 (dd,  $J = 8.4, 2.4$  Hz, 1H, Ar), 6.04 (d,  $J = 2.1$  Hz, 1H, Ar), 5.21 (q,  $J = 1.5$  Hz,  $\text{CH}_3\text{C}=\text{CH}$ ), 3.75 (s,  $\text{OCH}_3$ ), 3.70 (br s, NH), 1.98 (d,  $J = 1.2$  Hz,  $\text{CH}_3\text{C}=\text{CH}$ ), 1.27 (s,  $\text{NC}(\text{CH}_3)_2$ );  $^{13}\text{C}\{^1\text{H}\}$  NMR ( $\text{CDCl}_3$ , 75 MHz)  $\delta$  160.2, 144.7, 128.2, 126.1, 124.7, 115.4, 102.2, 98.6, 55.1 ( $\text{OCH}_3$ ), 51.9 ( $\text{C}(\text{CH}_3)_2$ ), 31.1 ( $\text{C}(\text{CH}_3)_2$ ), 18.73 ( $\text{CH}_3\text{C}=\text{CH}$ ); GC-MS ( $M^+ = 203$ ); Anal. Calcd for  $\text{C}_{13}\text{H}_{17}\text{NO}$ : C, 76.81; H, 8.43. Found C, 76.76; H, 8.48.

For **5e**:  $^1\text{H}$  NMR ( $\text{CDCl}_3$ , 300 MHz)  $\delta$  7.02 (d,  $J = 8.4$  Hz, 1H, Ar), 6.17 (dd,  $J = 8.4, 2.4$  Hz, 1H, Ar), 6.01 (d,  $J = 2.4$  Hz, 1H, Ar), 5.10 (s,  $\text{CH}_3\text{C}=\text{CH}$ ), 3.75 (s,  $\text{OCH}_3$ ), 3.65 (br s, NH), 2.35 (m,  $\text{CH}_2$ ), 1.57–1.29 (m, 10 H), 1.23 ( $\text{CH}_3$ ), 0.96 (t,  $J = 7.5$  Hz,  $\text{CH}_3$ ), 0.91 (t,  $J = 6.6$  Hz,  $\text{CH}_3$ );  $^{13}\text{C}\{^1\text{H}\}$  NMR ( $\text{CDCl}_3$ , 75 MHz)  $\delta$  160.1, 145.5, 132.8, 124.5, 124.2, 114.2, 101.8, 98.5, 55.1 ( $\text{OCH}_3$ ), 54.7 ( $\text{NC}(\text{CH}_3)_2$ ), 44.1, 31.9, 30.7, 30.2, 26.6, 23.3, 22.8, 14.3, 14.2; HRMS ( $m/z$ ): calcd for  $\text{C}_{19}\text{H}_{29}\text{NO}$  ( $M^+$ ), 287.2249; found, 287.2227.

For **5f**:  $^1\text{H}$  NMR ( $\text{CDCl}_3$ , 300 MHz)  $\delta$  7.38 (t,  $J = 7.8$  Hz, 2H, Ar), 7.18–7.07 (m, 4H, Ar), 6.36 (dd,  $J =$



8.4, 1.8 Hz, 1H, Ar), 6.16 (d,  $J = 2.1$  Hz, 1H, Ar), 5.31 (s,  $\text{CH}_3\text{C}=\text{CH}$ ), 3.73 (br s, NH), 2.06 (s,  $\text{CH}_3$ ), 1.33 (s,  $(\text{CH}_3)_2$ );  $^{13}\text{C}\{^1\text{H}\}$  NMR ( $\text{CDCl}_3$ , 75 MHz)  $\delta$  157.8, 157.2, 144.8, 129.7, 128.1, 127.0, 124.9, 123.2, 119.2, 117.2, 107.3, 103.0, 52.0 ( $\text{NC}(\text{CH}_3)_2$ ), 31.2 ( $\text{NC}(\text{CH}_3)_2$ ), 18.8 ( $\text{CH}_3\text{C}=\text{CH}$ ); GC-MS ( $\text{M}^+ = 265$ ); Anal. Calcd for  $\text{C}_{18}\text{H}_{19}\text{NO}$ : C, 81.48; H, 7.22. Found C, 81.19; H, 7.18.

For **5g**:  $^1\text{H}$  NMR ( $\text{CDCl}_3$ , 300 MHz)  $\delta$  6.90 (d,  $J = 8.4$  Hz, 1H, Ar), 6.11 (dd,  $J = 8.4, 2.4$  Hz, 1H, Ar), 5.90 (d,  $J = 2.4$  Hz, 1H, Ar), 5.16 (q,  $J = 1.5$  Hz,  $\text{CH}_3\text{C}=\text{CH}$ ), 4.54 and 4.23 (br s, NH and OH), 1.92 (d,  $J = 1.4$  Hz, 1H,  $\text{CH}_3\text{C}=\text{CH}$ ), 1.22 (s,  $\text{NC}(\text{CH}_3)_2$ );  $^{13}\text{C}\{^1\text{H}\}$  NMR ( $\text{CDCl}_3$ , 75 MHz)  $\delta$  156.3, 144.9, 128.4, 126.2, 125.8, 125.0, 104.6, 100.4, 52.1 ( $\text{NC}(\text{CH}_3)_2$ ), 31.3 ( $(\text{CH}_3)_2$ ), 18.8 ( $\text{CH}_3\text{C}=\text{CH}$ ); HRMS ( $m/z$ ): calcd for  $\text{C}_{12}\text{H}_{15}\text{NO}$  ( $\text{M}^+$ ), 189.2568; found, 189.2573.

For **5h**:  $^1\text{H}$  NMR ( $\text{CDCl}_3$ , 300 MHz)  $\delta$  6.99 (d,  $J = 8.4$  Hz, 1H, Ar), 6.21 (dd,  $J = 8.1, 2.4$  Hz, 1H, Ar), 6.12 (d,  $J = 2.4$  Hz, 1H, Ar), 5.18 (s,  $\text{CH}_3\text{C}=\text{CH}$ ), 3.79 (s,  $\text{OCH}_3$ ), 2.79 (s,  $\text{NCH}_3$ ), 1.97 (d,  $J = 1.2$  Hz,  $\text{CH}_3\text{C}=\text{CH}$ ), 1.30 (s,  $(\text{CH}_3)_2$ );  $^{13}\text{C}\{^1\text{H}\}$  NMR ( $\text{CDCl}_3$ , 75 MHz)  $\delta$  160.8, 146.9, 128.1, 127.9, 124.3, 117.5, 99.8, 98.4, 56.5 ( $\text{OCH}_3$ ), 55.35 ( $\text{NC}(\text{CH}_3)_2$ ), 30.9 ( $\text{NCH}_3$ ), 27.5 ( $(\text{CH}_3)_2$ ), 18.9 ( $\text{CH}_3\text{C}=\text{CH}$ ); HRMS ( $m/z$ ): calcd for  $\text{C}_{14}\text{H}_{19}\text{NO}$  ( $\text{M}^+$ ), 217.1467; found, 217.1464.

For **5i**:  $^1\text{H}$  NMR ( $\text{CDCl}_3$ , 300 MHz)  $\delta$  7.77 (d,  $J = 7.2$  Hz, 2H, Ar), 7.55–7.41 (m, 8H, Ar), 7.10 (d,  $J = 8.1$  Hz, 1H, Ar), 6.40–6.32 (m, 2H, Ar), 5.42 (s,  $\text{CH}_3\text{C}=\text{CH}$ ), 3.96 (s,  $\text{OCH}_3$ ), 2.79 (s,  $\text{NCH}_3$ ), 1.97 (s,  $\text{CH}_3$ );  $^{13}\text{C}\{^1\text{H}\}$  NMR ( $\text{CDCl}_3$ , 75 MHz)  $\delta$  161.2, 147.6, 146.6, 139.7, 133.5, 129.1, 128.4, 128.2, 128.1, 128.0, 127.3, 127.0, 126.8, 115.0, 99.6, 97.6, 63.5 ( $\text{OCH}_3$ ), 55.2 ( $\text{NC}(\text{CH}_3)_2$ ), 33.1 ( $\text{NCH}_3$ ), 23.5 ( $\text{CH}_3$ ); GC-MS ( $\text{M}^+ = 341$ ); Anal. Calcd for  $\text{C}_{24}\text{H}_{23}\text{NO}$ : C, 84.42; H, 6.79. Found C, 84.31; H, 6.88.

For **5j**:  $^1\text{H}$  NMR ( $\text{CDCl}_3$ , 300 MHz)  $\delta$  7.55 (d,  $J = 8.7$  Hz, 2H, Ar), 7.34 (d,  $J = 8.7$  Hz, 2H, Ar), 6.96–6.92 (m, 5H, Ar), 6.22–6.17 (m, 2H, Ar), 5.24 (s,  $\text{CH}_3\text{C}=\text{CH}$ ), 3.86 (s,  $\text{OCH}_3$ ), 3.85 (s,  $\text{OCH}_3$ ), 3.84 (s,  $\text{OCH}_3$ ), 2.64 (s,  $\text{NCH}_3$ ), 1.80 (s,  $\text{CH}_3$ );  $^{13}\text{C}\{^1\text{H}\}$  NMR ( $\text{CDCl}_3$ , 75 MHz)  $\delta$  161.1, 158.9, 158.5, 146.7, 139.9, 132.9, 132.2, 130.2, 128.1, 128.0, 126.9, 115.3, 113.6, 113.5, 99.5, 97.6, 62.9 ( $\text{NC}(\text{CH}_3)_2$ ), 55.4 ( $\text{OCH}_3$ ), 55.3 ( $\text{OCH}_3$ ), 55.2 ( $\text{OCH}_3$ ), 32.9 ( $\text{NCH}_3$ ), 23.6 ( $\text{CH}_3$ ); HRMS ( $m/z$ ): calcd for  $\text{C}_{26}\text{H}_{27}\text{NO}_3$  ( $\text{M}^+$ ), 401.1991; found, 401.1985.

For **5k**:  $^1\text{H}$  NMR ( $\text{CDCl}_3$ , 300 MHz)  $\delta$  7.64 (d,  $J = 8.7$  Hz, 2H, Ar), 7.34 (d,  $J = 7.2$  Hz, 2H, Ar), 7.25–7.21 (m, 3H, Ar), 7.10 (m, 2H, Ar), 5.45 (s,  $\text{CH}_3\text{C}=\text{CH}$ ), 3.86 (s,  $\text{OCH}_3$ ), 2.78 (s,  $\text{NCH}_3$ ), 1.96 (s,  $\text{CH}_3$ );  $^{13}\text{C}\{^1\text{H}\}$  NMR ( $\text{CDCl}_3$ , 75 MHz)  $\delta$  161.2, 147.3, 146.8, 139.5, 133.5, 129.3, 128.1, 128.0, 127.8, 127.5, 127.3, 127.0, 126.5, 115.0, 99.8, 98.6, 55.3 ( $\text{OCH}_3$ ), 53.2 ( $\text{NC}(\text{CH}_3)_2$ ), 32.3 ( $\text{NCH}_3$ ), 23.5 ( $\text{CH}_3$ ); GC-MS ( $\text{M}^+ = 353$ ); Anal.

Calcd for C<sub>20</sub>H<sub>19</sub>NOS<sub>2</sub>: C, 67.95; H, 5.42. Found C, 67.46; H, 5.63.

For **5l**: <sup>1</sup>H NMR (CDCl<sub>3</sub>, 300 MHz) δ 7.11 (s, 1H, Ar), 6.12 (s, 1H, Ar), 5.33 (s, CH<sub>3</sub>C=CH), 3.78 (s, OCH<sub>3</sub>), 3.76 (s, OCH<sub>3</sub>), 3.65 (br s, NH), 1.97 (d, *J* = 1.2 Hz, CH<sub>3</sub>C=CH), 1.32 (NC(CH<sub>3</sub>)<sub>2</sub>); <sup>13</sup>C{<sup>1</sup>H} NMR (CDCl<sub>3</sub>, 75 MHz) δ 145.0, 144.6, 128.7, 128.3, 124.3, 122.5, 121.2, 114.3, 59.2 (OCH<sub>3</sub>), 59.1 (OCH<sub>3</sub>), 52.1 (NC(CH<sub>3</sub>)<sub>2</sub>), 31.3 (NC(CH<sub>3</sub>)<sub>2</sub>), 18.4 (CH<sub>3</sub>C=CH); GC-MS (*M*<sup>+</sup> = 233); Anal. Calcd for C<sub>14</sub>H<sub>19</sub>NO<sub>2</sub>: C, 72.07; H, 8.21. Found C, 72.35; H, 8.51.

For **5m**: <sup>1</sup>H NMR (CDCl<sub>3</sub>, 300 MHz) δ 7.01 (s, 1H, Ar), 6.32 (s, 1H, Ar), 5.31 (s, CH<sub>3</sub>C=CH), 3.64 (br s, NH), 2.26 (s, ArCH<sub>3</sub>), 1.97 (d, *J* = 1.2 Hz, CH<sub>3</sub>C=CH), 1.27 (NC(CH<sub>3</sub>)<sub>2</sub>); <sup>13</sup>C{<sup>1</sup>H} NMR (CDCl<sub>3</sub>, 75 MHz) δ 142.0, 135.6, 128.8, 127.8, 124.0, 122.1, 121.2, 115.2, 52.1 (NC(CH<sub>3</sub>)<sub>2</sub>), 31.0 (NC(CH<sub>3</sub>)<sub>2</sub>), 20.1 (ArCH<sub>3</sub>), 18.6 (CH<sub>3</sub>C=CH); HRMS (*m/z*): calcd for C<sub>13</sub>H<sub>16</sub>NCl (*M*<sup>+</sup>), 221.0971; found, 211.0965.

For **5n**: <sup>1</sup>H NMR (CDCl<sub>3</sub>, 300 MHz) δ 7.38 (d, *J* = 8.4 Hz, 1H, Ar), 7.06–6.85 (m, 5H, Ar), 4.84 (q, *J* = 1.5 Hz, CH<sub>3</sub>C=CH), 3.85 (br s, NH), 1.64 (d, *J* = 1.5 Hz, CH<sub>3</sub>C=CH), 0.83 (s, CH<sub>3</sub>); <sup>13</sup>C{<sup>1</sup>H} NMR (CDCl<sub>3</sub>, 75 MHz) δ 138.9, 135.1, 129.9, 129.4, 126.7, 126.0, 125.1, 123.3, 122.7, 120.7, 116.9, 116.2, 52.5 (NC(CH<sub>3</sub>)<sub>2</sub>), 31.6 (NC(CH<sub>3</sub>)<sub>2</sub>), 19.8 (CH<sub>3</sub>C=CH); GC-MS (*M*<sup>+</sup> = 223).

For **5o**: <sup>1</sup>H NMR (CDCl<sub>3</sub>, 300 MHz) δ 7.02 (s, 1H, Ar), 6.42 (s, 1H, Ar), 5.34 (s, CH<sub>3</sub>C=CH), 3.58 (br s, NH), 2.88 (t, *J* = 7.2 Hz, 2CH<sub>2</sub>), 2.09 (m, CH<sub>2</sub>), 2.06 (d, *J* = 0.9 Hz, CH<sub>3</sub>C=CH), 1.30 (s, NC(CH<sub>3</sub>)<sub>2</sub>); <sup>13</sup>C{<sup>1</sup>H} NMR (CDCl<sub>3</sub>, 75 MHz) δ 144.5, 142.1, 132.8, 128.9, 127.7, 120.2, 119.4, 109.2, 51.7 (NC(CH<sub>3</sub>)<sub>2</sub>), 33.1, 32.2, 30.8, 25.7, 18.9 (CH<sub>3</sub>C=CH); GC-MS (*M*<sup>+</sup> = 213); Anal. Calcd for C<sub>15</sub>H<sub>19</sub>N: C, 84.46; H, 8.98. Found C, 84.36; H, 8.84.

For **5p**: <sup>1</sup>H NMR (C<sub>6</sub>D<sub>6</sub>, 300 MHz) δ 6.90 (br s, NH), 6.83 (d, *J* = 8.7 Hz, 1H, Ar), 6.70 (s, 1H, Ar), 6.61 (t, *J* = 2.7 Hz, 1H, Ar), 6.38 (d, *J* = 8.1 Hz, 1H, Ar), 5.22 (s, CH<sub>3</sub>C=CH), 3.59 (br s, NH), 2.34 (s, CH<sub>3</sub>), 1.16 (s, NC(CH<sub>3</sub>)<sub>2</sub>); <sup>13</sup>C{<sup>1</sup>H} NMR (C<sub>6</sub>D<sub>6</sub>, 75 MHz) δ 138.1, 131.5, 131.1, 127.8, 125.5, 123.8, 113.4, 111.5, 111.3, 102.6, 51.0 (NC(CH<sub>3</sub>)<sub>2</sub>), 29.5 (NC(CH<sub>3</sub>)<sub>2</sub>), 22.6 (CH<sub>3</sub>C=CH); HRMS (*m/z*): calcd for C<sub>14</sub>H<sub>16</sub>N<sub>2</sub> (*M*<sup>+</sup>), 212.1313; found, 212.1307.

For **5q**: <sup>1</sup>H NMR (C<sub>6</sub>D<sub>6</sub>, 300 MHz) δ 6.91, (s, 1H Ar), 6.10 (s, 1H, Ar), 5.06 (q, *J* = 0.9 Hz, CH<sub>3</sub>C=CH), 3.66 (m, 2CH<sub>2</sub>), 1.77 (d, *J* = 1.5 Hz, CH<sub>3</sub>C=CH), 1.05 (s, NC(CH<sub>3</sub>)<sub>2</sub>); <sup>13</sup>C{<sup>1</sup>H} NMR (C<sub>6</sub>D<sub>6</sub>, 75 MHz) δ 144.6, 138.4, 136.2, 128.8, 127.8, 116.8, 113.3, 102.1, 65.2 and 64.5 (OCH<sub>2</sub>CH<sub>2</sub>O), 51.9 ((NC(CH<sub>3</sub>)<sub>2</sub>), 30.8 (NC(CH<sub>3</sub>)<sub>2</sub>), 19.1 (CH<sub>3</sub>C=CH); HRMS (*m/z*): calcd for C<sub>14</sub>H<sub>17</sub>NO<sub>2</sub> (*M*)<sup>+</sup>, 231.1259; found, 231.1273.

For **7a**:  $^1\text{H}$  NMR ( $\text{CDCl}_3$ , 300 MHz)  $\delta$  7.26 (dd,  $J = 7.8, 1.5$  Hz, 1H, Ar), 7.12 (dd,  $J = 3.0, 1.8$  Hz, 1H, Ar), 6.92 (td,  $J = 7.8, 1.5$  Hz, 1H, Ar), 6.77 (td,  $J = 7.8, 1.2$  Hz, 1H, Ar), 6.69 (dd,  $J = 8.1, 1.2$  Hz, 1H, Ar), 6.28 (t,  $J = 3.3$  Hz, 1H, Ar), 5.96 (dd,  $J = 3.3, 1.8$  Hz, 1H, Ar) 3.74 (br s, NH), 1.69 (m,  $\text{CH}_2$ ), 1.47 (s,  $\text{CH}_3$ ), 0.85 (t,  $J = 7.2$  Hz,  $\text{CH}_2\text{CH}_3$ );  $^{13}\text{C}\{^1\text{H}\}$  NMR ( $\text{CDCl}_3$ , 75 MHz)  $\delta$  135.5, 133.5, 125.2, 124.8, 118.8, 115.5, 114.6, 114.0, 109.9, 103.2, 54.5 ( $\text{NC}(\text{CH}_3)(\text{CH}_2\text{CH}_3)$ ), 34.6 ( $\text{CH}_2$ ), 26.7 ( $\text{CH}_3$ ), 8.9 ( $\text{CH}_3$ ); GC-MS ( $M^+ = 212$ ); Anal. Calcd for  $\text{C}_{14}\text{H}_{16}\text{N}_2$ : C, 79.21; H, 7.60. Found C, 79.25; H, 7.58.

For **7b**:  $^1\text{H}$  NMR ( $\text{CDCl}_3$ , 300 MHz)  $\delta$  7.29–7.13 (m, 7H, Ar), 6.91 (td,  $J = 7.8, 1.2$  Hz, 1H, Ar), 6.74 (m, 2H, Ar), 6.32 (t,  $J = 3$  Hz, 1H, Ar), 6.05 (dd,  $J = 3.6, 1.5$  Hz, 1H, Ar), 4.36 (br s, NH), 1.86 (s,  $\text{CH}_3$ );  $^{13}\text{C}\{^1\text{H}\}$  NMR ( $\text{CDCl}_3$ , 75 MHz)  $\delta$  146.5, 135.3, 133.1, 128.4, 127.1, 125.9, 125.8, 124.9, 119.4, 115.9, 114.8, 114.5, 110.1, 104.7, 57.0 ( $\text{NC}(\text{CH}_3)(\text{Ph})$ ), 29.5 ( $\text{CH}_3$ ); GC-MS ( $M^+ = 260$ ).

For **7c**:  $^1\text{H}$  NMR ( $\text{CDCl}_3$ , 300 MHz)  $\delta$  7.12–7.02 (m, 4H, Ar), 6.78 (t,  $J = 7.2$  Hz, 1H, Ar), 6.59 (m, 4H, Ar), 6.20 (t,  $J = 3$  Hz, 1H, Ar), 5.88 (dd,  $J = 3.3, 1.2$  Hz, 1H, Ar), 4.18 (br s, NH), 3.54 (s,  $\text{OCH}_3$ ), 1.71 (s,  $\text{CH}_3$ );  $^{13}\text{C}\{^1\text{H}\}$  NMR ( $\text{CDCl}_3$ , 75 MHz)  $\delta$  158.4, 138.6, 135.4, 133.5, 127.1, 125.7, 124.8, 119.3, 115.9, 114.7, 114.3, 113.5, 110.1, 104.5, 56.5 ( $\text{NC}(\text{CH}_3)(\text{C}_6\text{H}_4\text{-}p\text{-OMe})$ ), 55.2 ( $\text{OCH}_3$ ), 29.3 ( $\text{CH}_3$ ); HRMS ( $m/z$ ): calcd for  $\text{C}_{19}\text{H}_{18}\text{N}_2\text{O}$  ( $M^+$ ), 290.1419; found, 290.1420.

For **7d**:  $^1\text{H}$  NMR ( $\text{CDCl}_3$ , 300 MHz)  $\delta$  7.19 (dd,  $J = 7.8, 1.2$  Hz, 1H, Ar), 7.08 (q,  $J = 1.5$  Hz, 1H, Ar), 7.04 (dd,  $J = 5.4, 2.7$  Hz, 1H, Ar), (dd,  $J = 4.8, 1.5$  Hz, 1H, Ar), 6.88–6.83 (m, 2H, Ar), 6.71 (td,  $J = 7.5, 1.2$  Hz, 1H, Ar), 6.58 (dd,  $J = 8.1, 1.2$  Hz, 1H, Ar), 6.25 (t,  $J = 3.3$  Hz, 1H, Ar), 5.94 (dd,  $J = 3.6, 1.5$  Hz, 1H, Ar), 4.11 (br s, NH), 1.78 (s,  $\text{CH}_3$ );  $^{13}\text{C}\{^1\text{H}\}$  NMR ( $\text{CDCl}_3$ , 75 MHz)  $\delta$  148.4, 135.1, 133.1, 126.3, 125.9, 125.2, 124.8, 120.5, 119.3, 115.6, 114.6, 114.1, 110.1, 103.9, 54.8 ( $\text{NC}(\text{CH}_3)(2\text{-SC}_4\text{H}_9)$ ), 28.9 ( $\text{CH}_3$ ); HRMS ( $m/z$ ): calcd for  $\text{C}_{16}\text{H}_{14}\text{N}_2\text{S}$  ( $M^+$ ), 266.0878; found, 266.0875.

For **8a**:  $^1\text{H}$  NMR ( $\text{CDCl}_3$ , 300 MHz)  $\delta$  7.89 (d,  $J = 8.1$  Hz, 1H, Ar), 7.78 (m, 1H, Ar), 7.53 (d,  $J = 7.8$  Hz, 1H, Ar), 7.14–7.04 (m, 2H, Ar), 6.87–6.84 (m, 2H, Ar), 6.64 (m, 1H, Ar), 6.25 (s, 1H, Ar), 3.51 (br s, NH), 1.40 (s,  $(\text{CH}_3)_2$ );  $^{13}\text{C}\{^1\text{H}\}$  NMR ( $\text{CDCl}_3$ , 75 MHz)  $\delta$  143.3, 136.4, 134.1, 129.9, 126.9, 124.2, 122.3, 121.0, 120.9, 119.8, 116.7, 116.5, 111.9, 96.2, 51.8 ( $\text{NC}(\text{CH}_3)_2$ ), 28.6 ( $\text{NC}(\text{CH}_3)_2$ ); GC-MS ( $M^+ = 243$ ).

For **8b**:  $^1\text{H}$  NMR ( $\text{CDCl}_3$ , 300 MHz)  $\delta$  7.97 (d,  $J = 8.1$  Hz, 1H, Ar), 7.80 (dd,  $J = 7.8, 1.5$  Hz, 1H, Ar), 7.65 (d,  $J = 6.9$  Hz, 1H, Ar), 7.27–7.16 (m, 4H, Ar), 6.99–6.85 (m, 4H, Ar), 6.76 (dd,  $J = 7.2, 1.8$  Hz, 1H, Ar), 6.39 (s, 1H, Ar), 4.32 (br s, NH), 2.21 (s,  $\text{ArCH}_3$ ), 1.88 (s,  $\text{CH}_3$ );  $^{13}\text{C}\{^1\text{H}\}$  NMR ( $\text{CDCl}_3$ , 75 MHz)  $\delta$  142.1,

141.9, 136.9, 136.4, 134.2, 129.7, 129.1, 127.4, 126.1, 124.2, 122.6, 121.2, 121.0, 119.9, 116.9, 116.6, 111.9, 99.0, 57.6 (NC(CH<sub>3</sub>)(*p*-tol)), 29.2 (CH<sub>3</sub>), 21.1 (CH<sub>3</sub>); HRMS (m/z): calcd for C<sub>23</sub>H<sub>20</sub>N<sub>2</sub> (M<sup>+</sup>), 324.1626; found, 324.1632.

For **8c**: <sup>1</sup>H NMR (CDCl<sub>3</sub>, 300 MHz) δ 7.86 (d, *J* = 7.8 Hz, 1H, Ar), 7.80 (dd, *J* = 7.8, 1.5 Hz, 1H, Ar), 7.69 (d, *J* = 6.9 Hz, 1H, Ar), 7.15–7.04 (m, 4H, Ar), 6.88–6.75 (m, 4H, Ar), 6.54 (dd, *J* = 7.8, 1.5 Hz, 1H, Ar), 6.33 (s, 1H, Ar), 4.37 (br s, NH), 1.88 (s, CH<sub>3</sub>); <sup>13</sup>C{<sup>1</sup>H} NMR (CDCl<sub>3</sub>, 75 MHz) δ 152.1, 142.5, 135.6, 136.2, 133.4, 128.9, 128.1, 127.3, 126.6, 125.2, 123.4, 122.5, 121.0, 119.6, 117.1, 116.7, 111.9, 98.9, 55.3 (NC(CH<sub>3</sub>)(*p*-tol)), 23.5 (CH<sub>3</sub>); GC-MS (M<sup>+</sup> = 344). Anal. Calcd for C<sub>22</sub>H<sub>17</sub>N<sub>2</sub>Cl: C, 76.73; H, 4.98. Found C, 76.15; H, 5.12.

For **8d**: <sup>1</sup>H NMR (CDCl<sub>3</sub>, 300 MHz) δ 7.53 (d, *J* = 8.1 Hz, 1H, Ar), 7.22 (dd, *J* = 7.8, 1.2 Hz, 1H, Ar), 7.13 (d, *J* = 7.5 Hz, 1H, Ar), 7.10–7.02 (m, 2H, Ar), 6.91–6.85 (m, 2H, Ar), 6.38 (s, 1H, Ar), 4.38 (br s, NH), 3.75 (s, OCH<sub>3</sub>), 1.70 (m, CH<sub>2</sub>), 1.47 (s, CH<sub>3</sub>), 0.92 (t, *J* = 7.2 Hz, CH<sub>3</sub>); <sup>13</sup>C{<sup>1</sup>H} NMR (CDCl<sub>3</sub>, 75 MHz) δ 152.1, 136.2, 135.8, 133.4, 128.4, 128.1, 127.3, 126.5, 124.2, 122.6, 117.9, 116.9, 111.9, 99.0, 58.1 (OCH<sub>3</sub>), 56.9 (NC(CH<sub>3</sub>)(CH<sub>2</sub>CH<sub>3</sub>)), 34.8 (CH<sub>2</sub>), 26.9 (CH<sub>3</sub>), 9.8 (CH<sub>3</sub>); GC-MS (M<sup>+</sup> = 292); Anal. Calcd for C<sub>19</sub>H<sub>20</sub>N<sub>2</sub>O: C, 78.08; H, 6.85. Found C, 78.15; H, 6.72.

For **9a**: <sup>1</sup>H NMR (CDCl<sub>3</sub>, 300 MHz) δ 8.13 (br s, NH), 7.57 (d, *J* = 7.8 Hz, 1H, Ar), 7.35 (d, *J* = 8.1 Hz, 1H, Ar), 7.23–6.96 (m, 4H, Ar), 6.61 (t, *J* = 7.5 Hz, 1H, Ar), 6.51 (d, *J* = 7.8 Hz, 1H, Ar), 3.70 (br s, NH), 2.24 (m, 1H, CH<sub>2</sub>), 1.70 (s, CH<sub>3</sub>), 1.66–1.17 (m, 3H), 0.93–0.76 (m, 5H); <sup>13</sup>C{<sup>1</sup>H} NMR (CDCl<sub>3</sub>, 75 MHz) δ 143.9, 137.4, 130.9, 128.8, 125.9, 122.0, 120.2, 120.1, 119.6, 116.7, 113.5, 113.4, 113.0, 111.4, 57.9 (NC(CH<sub>3</sub>)(Bu)), 44.4 (CH<sub>2</sub>), 31.4 (CH<sub>2</sub>), 27.1 (CH<sub>2</sub>), 23.3 (CH<sub>3</sub>), 14.4 (CH<sub>3</sub>); HRMS (m/z): calcd for C<sub>20</sub>H<sub>22</sub>N<sub>2</sub> (M<sup>+</sup>), 290.1783; found, 290.1779.

For **9b**: <sup>1</sup>H NMR (CDCl<sub>3</sub>, 300 MHz) δ 8.17 (br s, NH), 7.82 (d, *J* = 7.5 Hz, 2H, Ar), 7.46 (t, *J* = 7.8 Hz, 2H, Ar), 7.39 (t, *J* = 6.9 Hz, 2H, Ar), 7.25 (t, *J* = 6.0 Hz, 2H, Ar), 7.19–7.09 (m, 3H, Ar), 6.82 (t, *J* = 7.2 Hz, 1H, Ar), 6.66 (d, *J* = 7.5 Hz, 1H, Ar), 4.33 (br s, NH), 2.24 (CH<sub>3</sub>); <sup>13</sup>C{<sup>1</sup>H} NMR (CDCl<sub>3</sub>, 75 MHz) δ 144.7, 139.2, 133.7, 126.9, 125.3, 124.8, 123.6, 123.2, 123.1, 122.2, 118.5, 116.9, 116.6, 115.9, 113.8, 110.9, 109.9, 107.8, 55.7 (NC(CH<sub>3</sub>)(Ph)), 25.6 (CH<sub>3</sub>); HRMS (m/z): calcd for C<sub>22</sub>H<sub>18</sub>N<sub>2</sub> (M<sup>+</sup>), 310.1470; found, 310.1467.

# The $^1\text{H}$ and $^{13}\text{C}$ NMR Spectra of Selected Organic Products

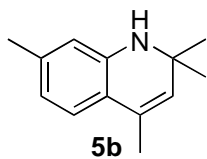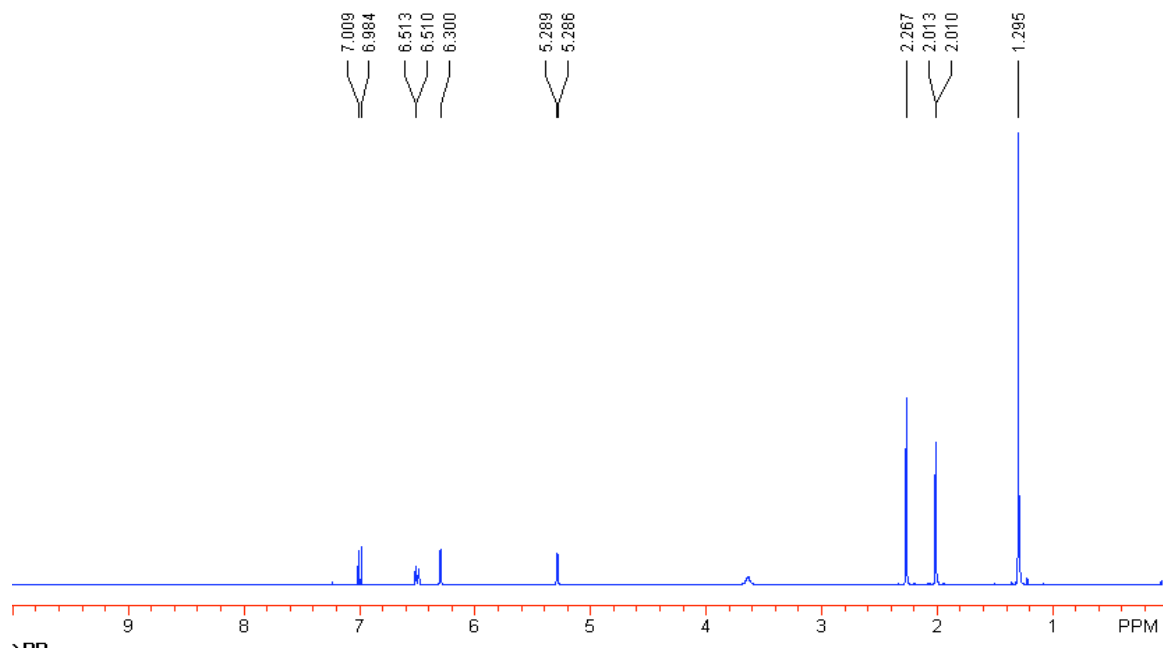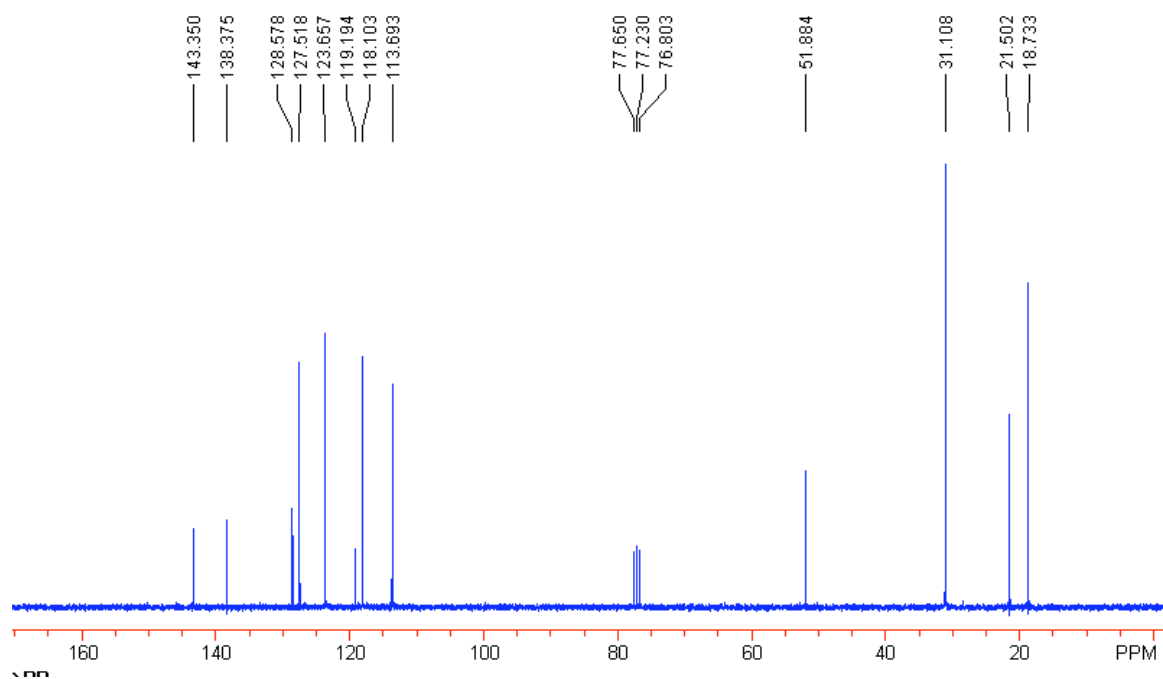

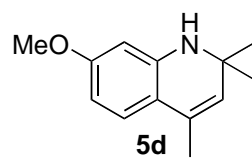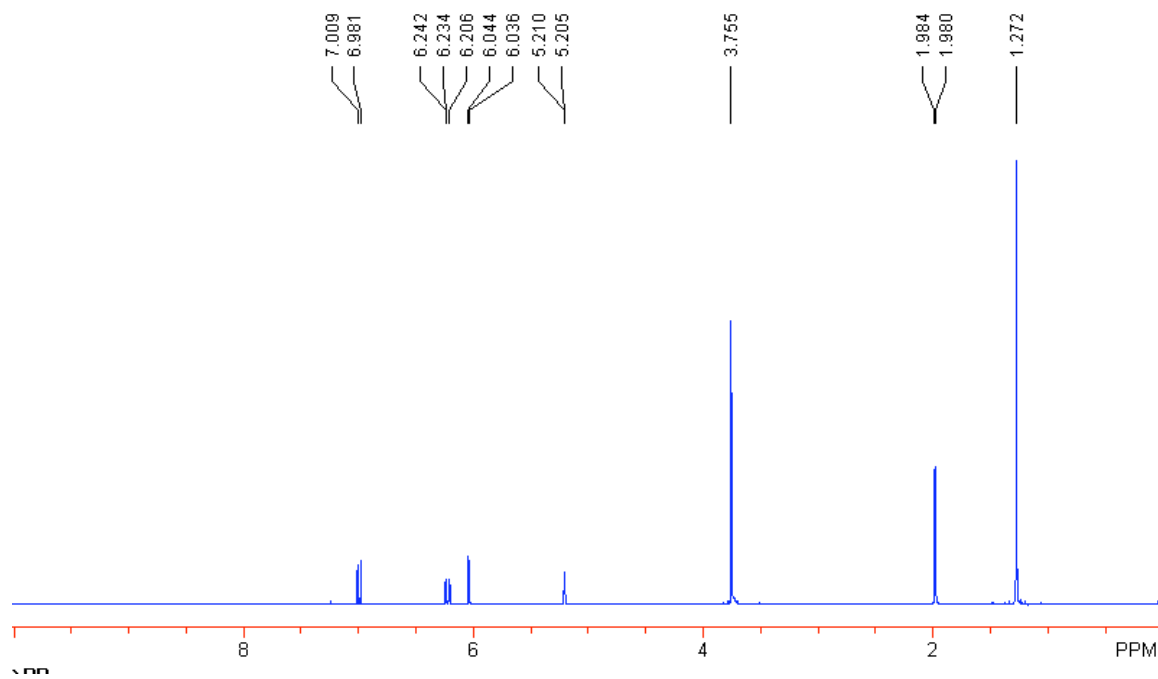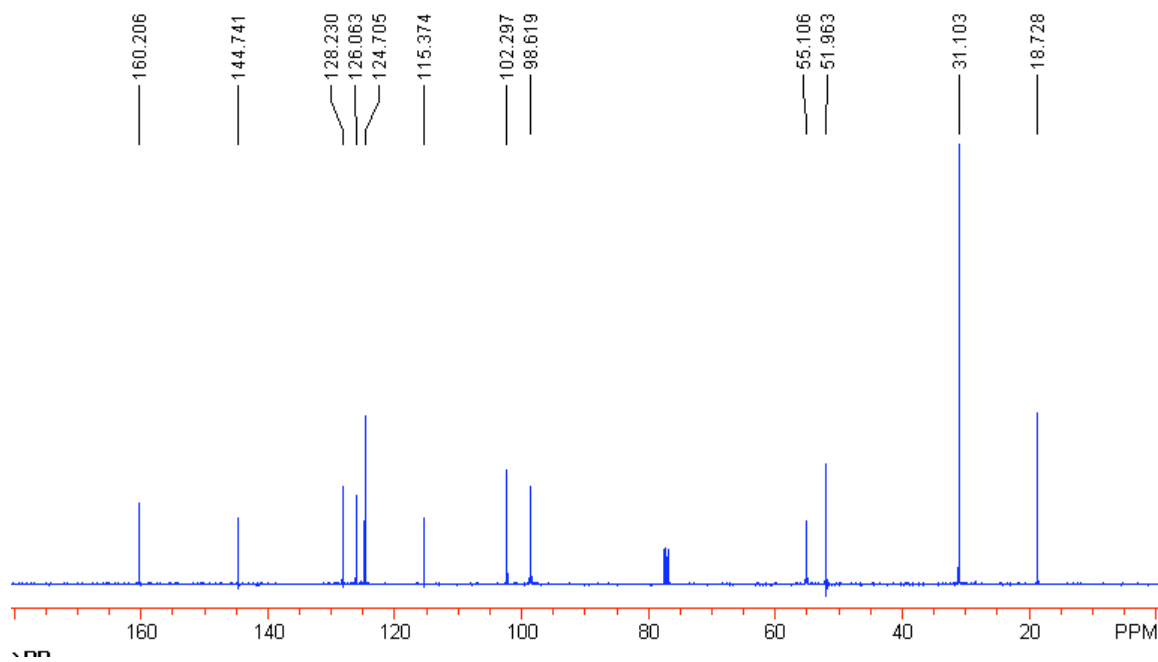

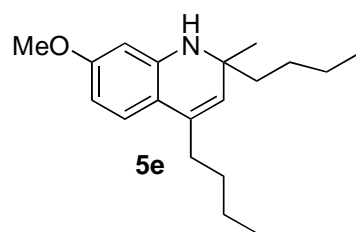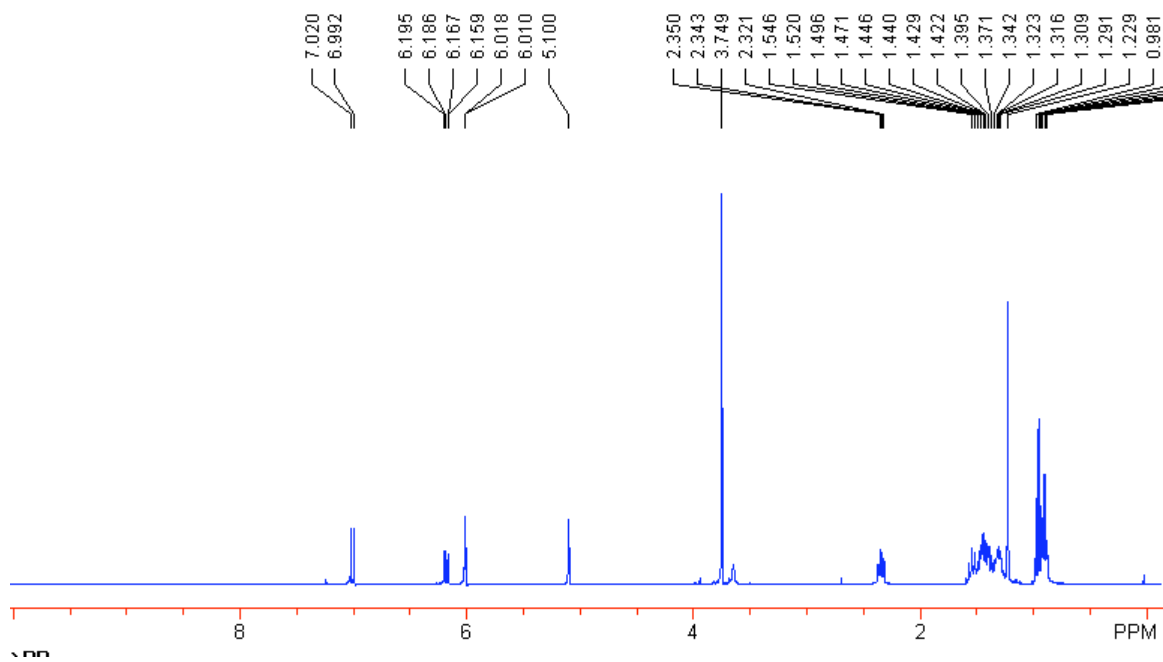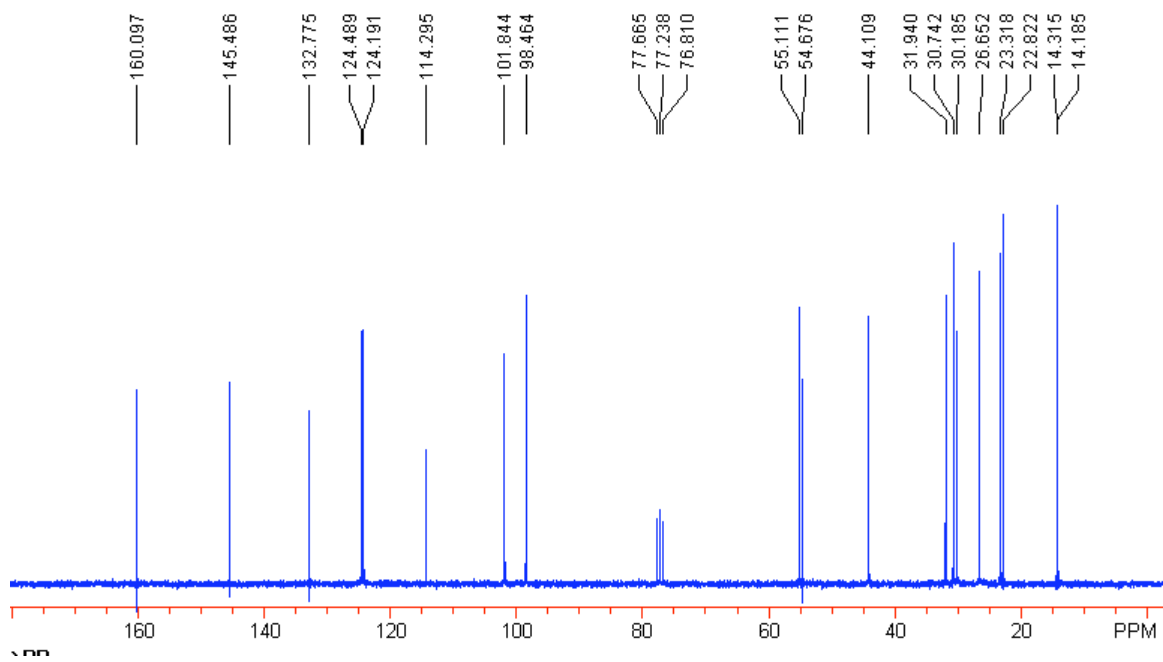

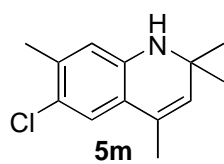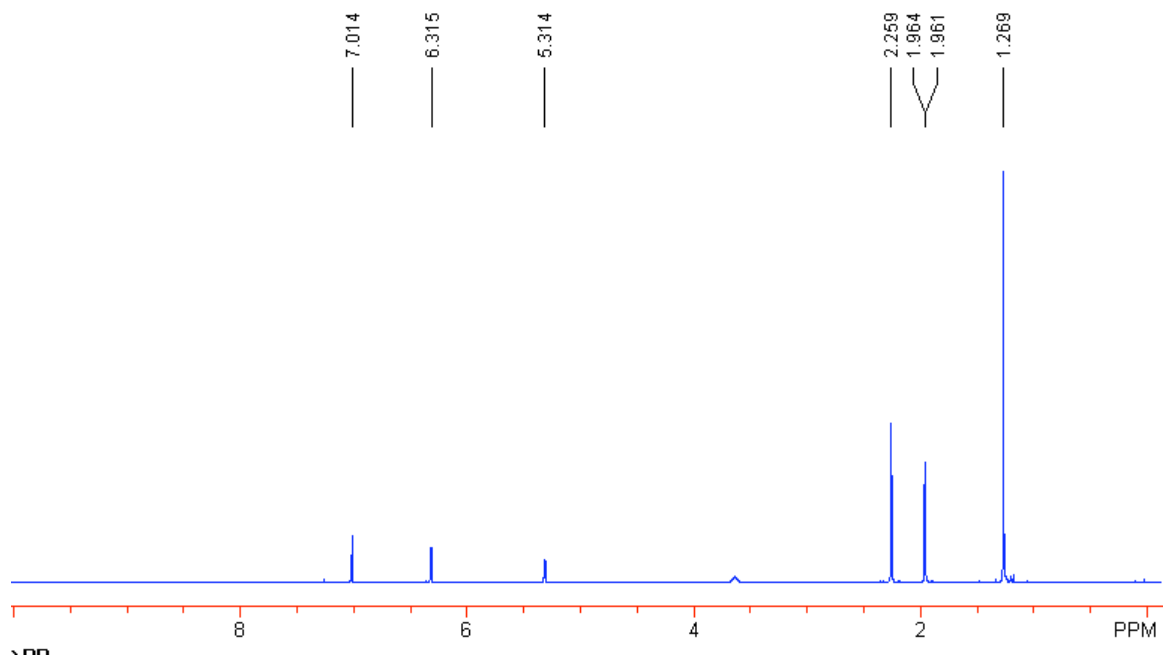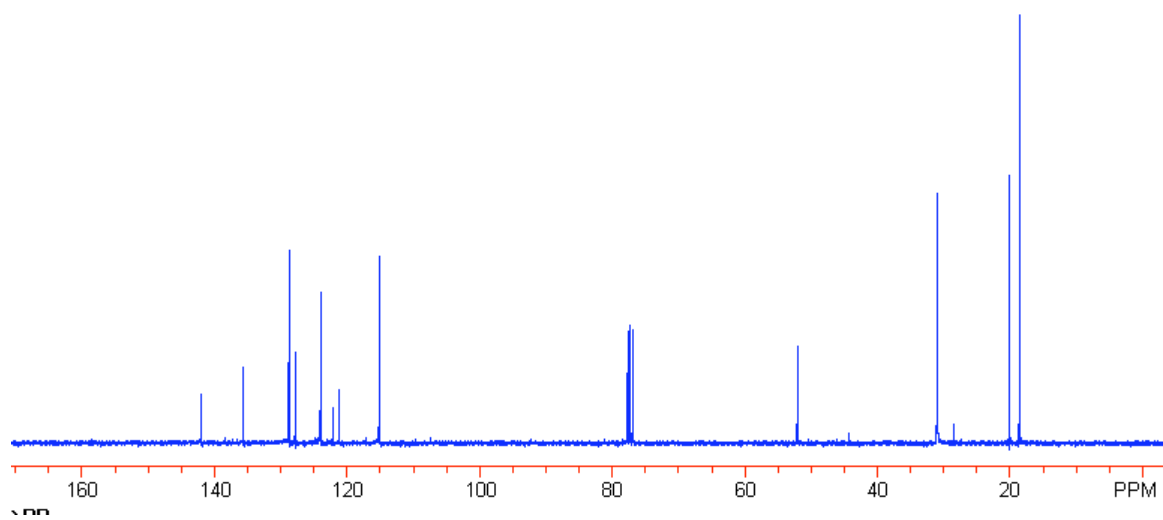



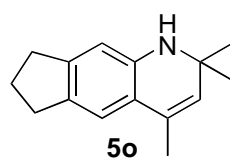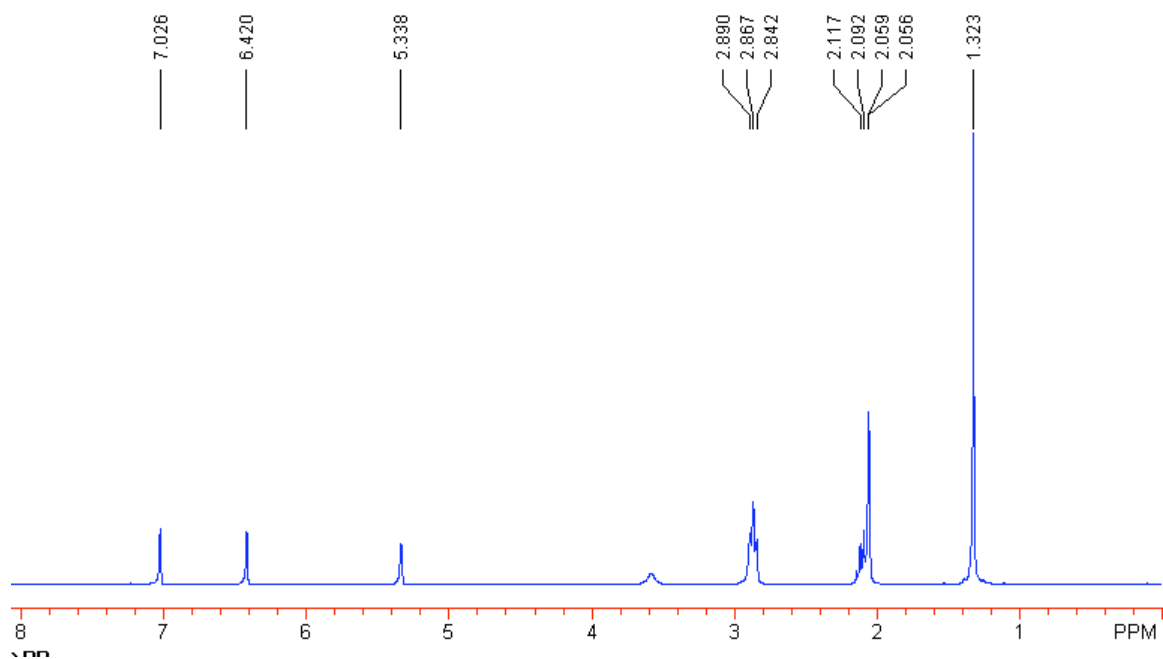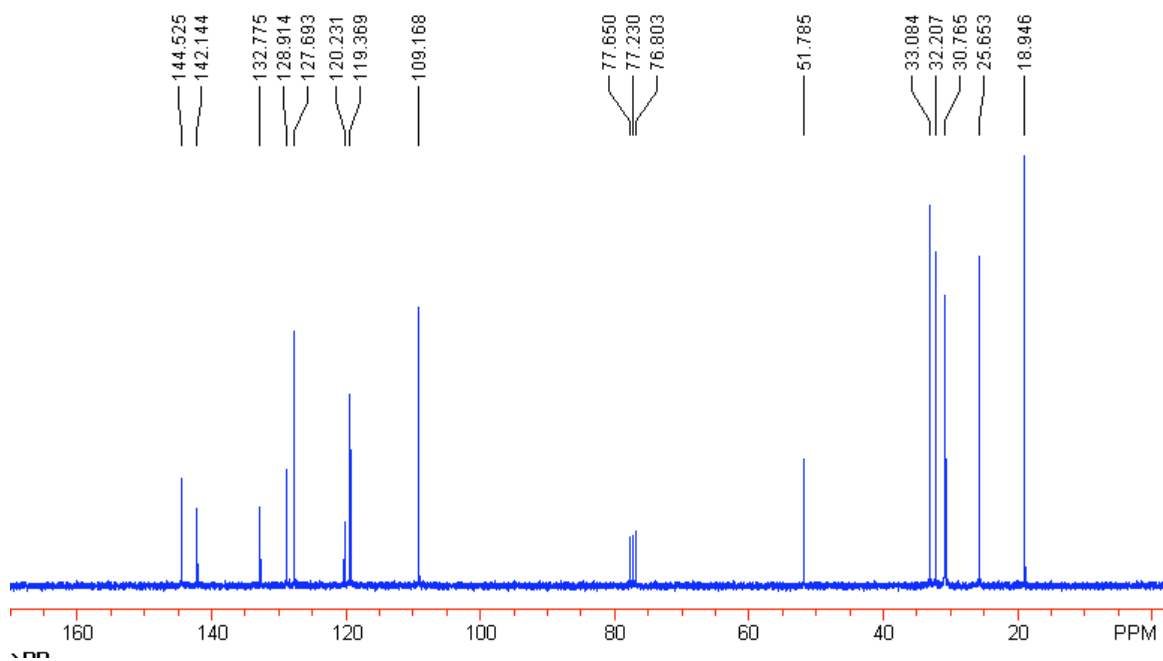

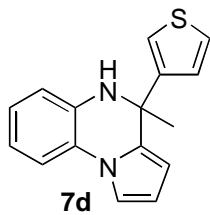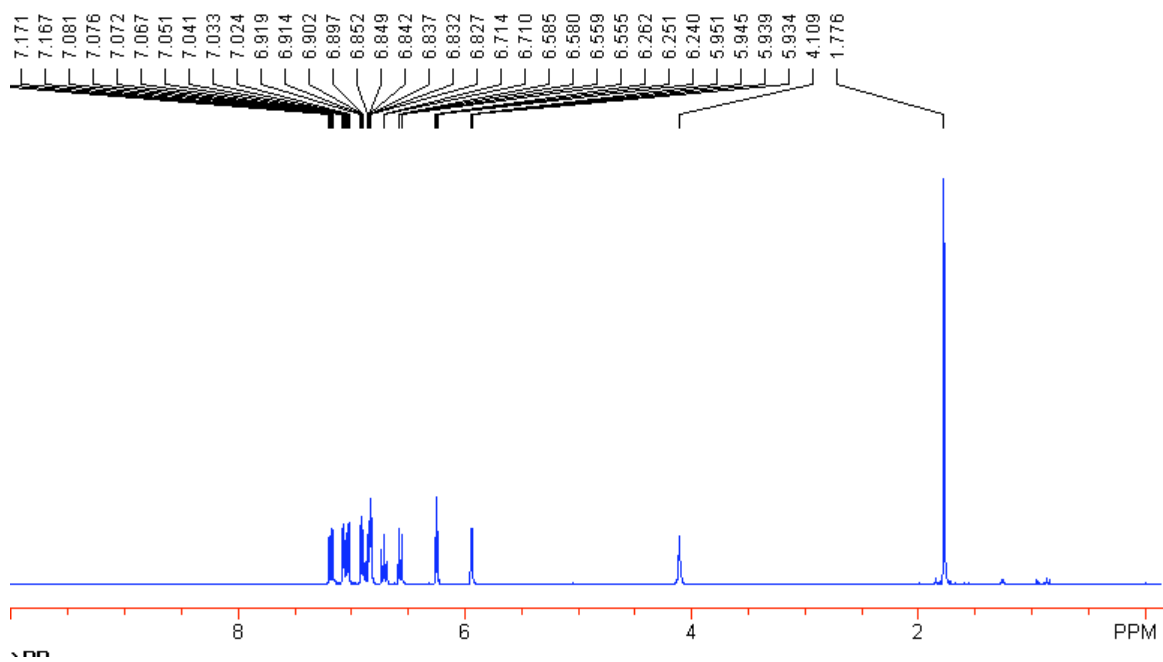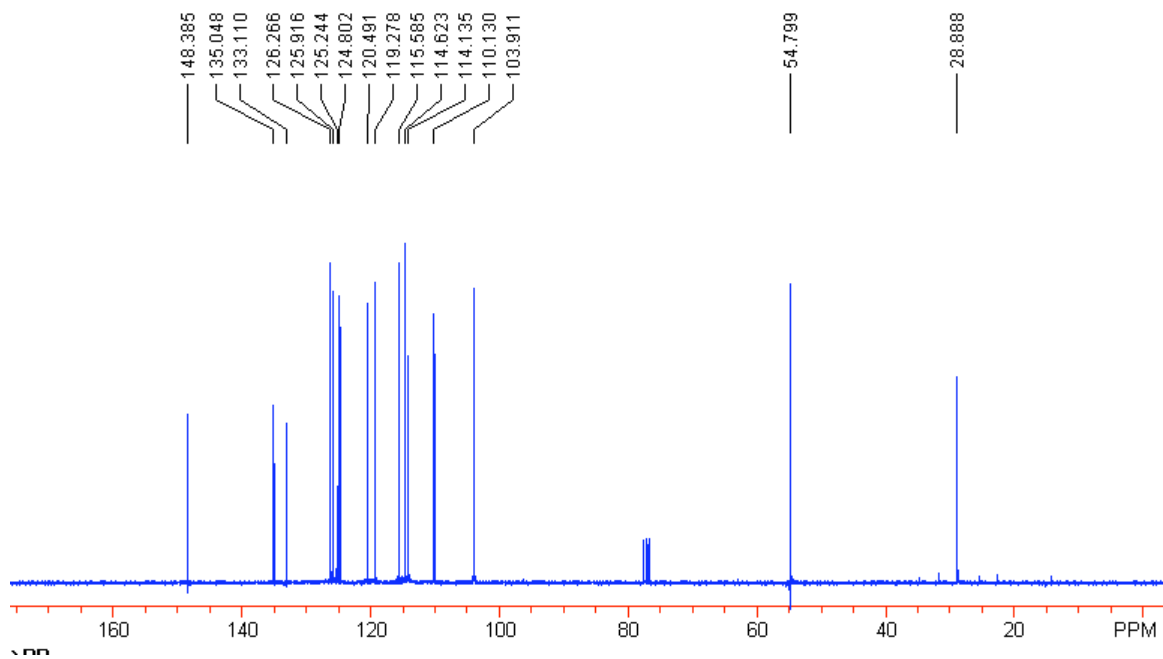

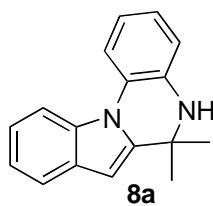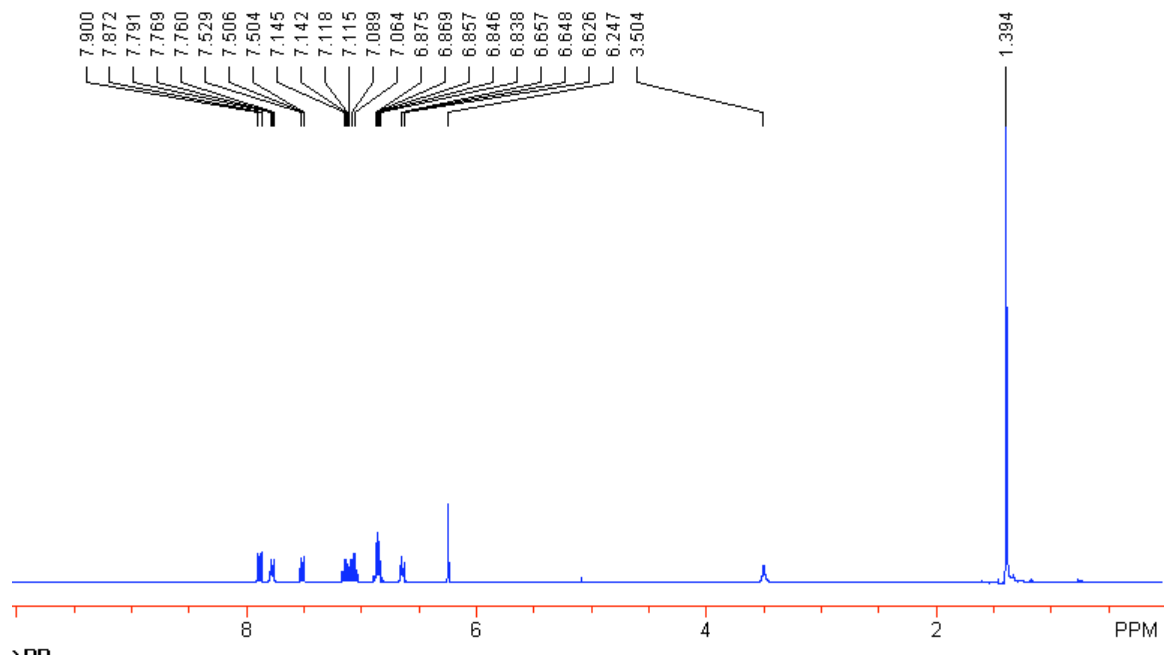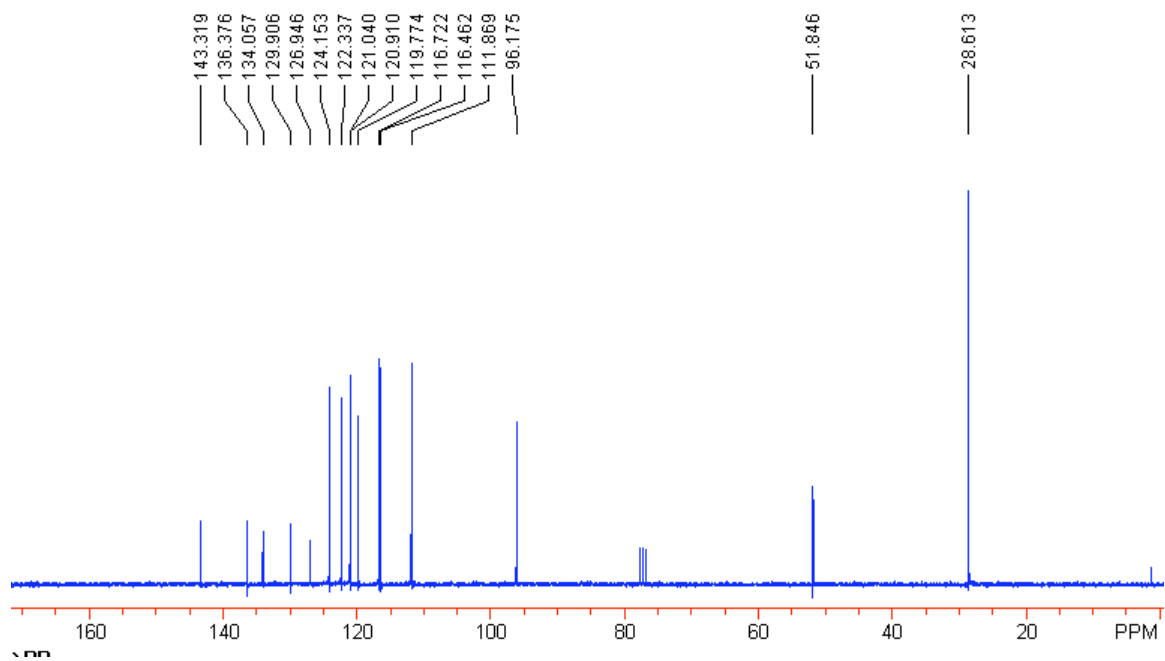

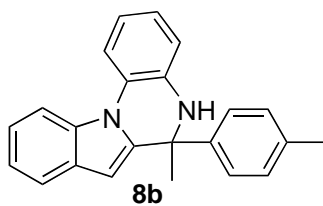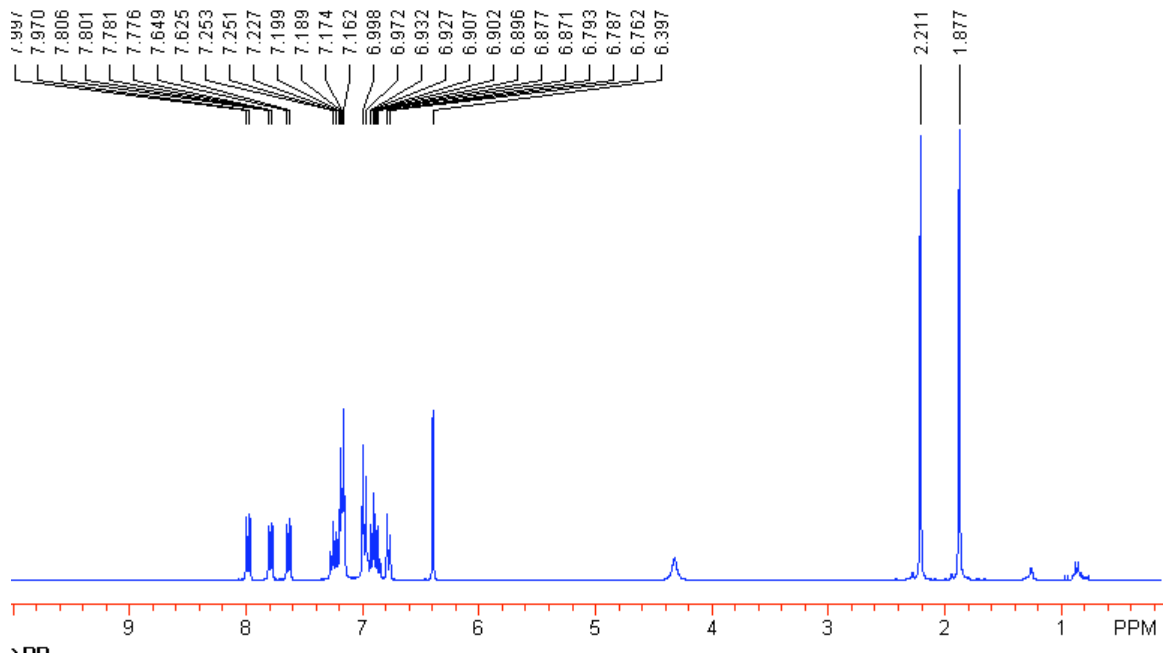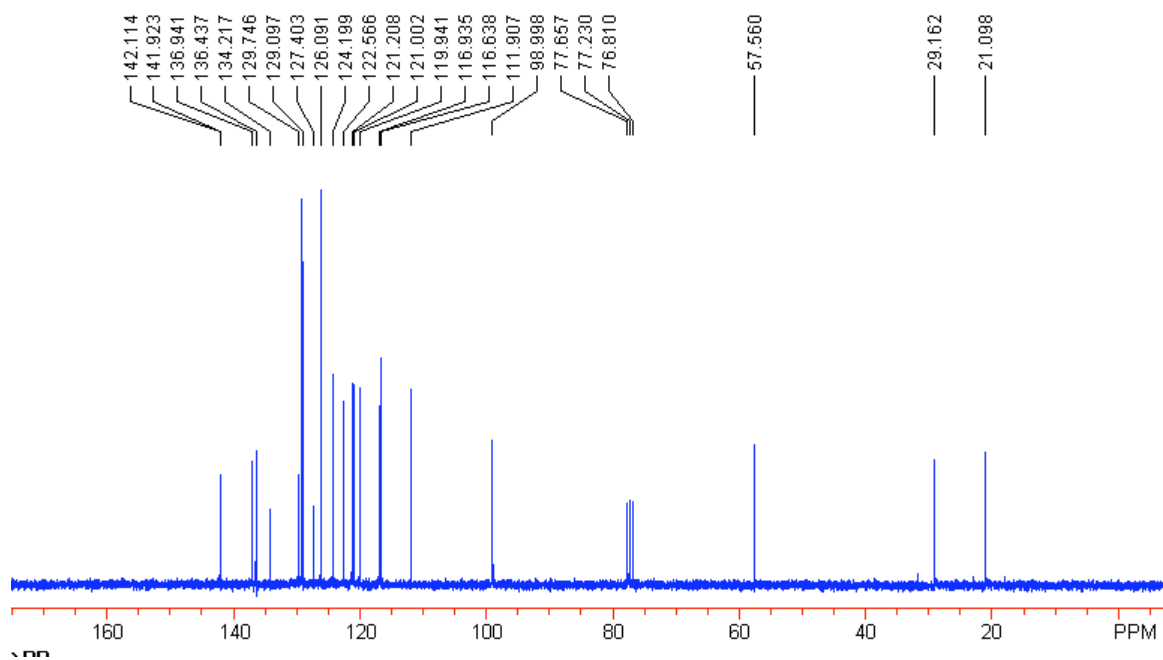

Supplement: NIHMS63206-supplement-1si20050927_05.pdf [file NIHMS63206-supplement-1si20050927_05.pdf]
